# Supplementary material for: SARS-CoV-2 Viral Load in the Pulmonary Compartment of Critically Ill COVID-19 Patients Correlates with Viral Serum Load and Fatal Outcomes
Source: MDPI journal article supplement (doi:10.3390/v14061292), 2022-06-14

Supplementary File 2

Youden's J statistics of mortality-dependent ROC curves

Clinical variables included are those that differed between Survivors and Non Survivors at admission with statistical significance

AGE

|                      |        |
|----------------------|--------|
| Youden index J       | 0.3059 |
| Associated criterion | 76     |
| Sensitivity          | 36.84  |
| Specificity          | 93.75  |

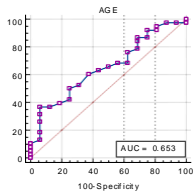

APACHE II

|                      |        |
|----------------------|--------|
| Youden index J       | 0.7599 |
| Associated criterion | 13     |
| Sensitivity          | 94.74  |
| Specificity          | 81.25  |

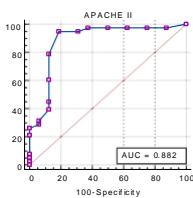

SOFA

|                      |        |
|----------------------|--------|
| Youden index J       | 0.7336 |
| Associated criterion | 5      |
| Sensitivity          | 92.11  |
| Specificity          | 81.25  |

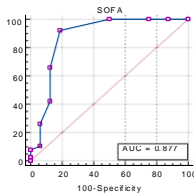

PaO<sub>2</sub>/FiO<sub>2</sub>

|                      |        |
|----------------------|--------|
| Youden index J       | 0.6908 |
| Associated criterion | 118    |
| Sensitivity          | 81.58  |
| Specificity          | 87.5   |

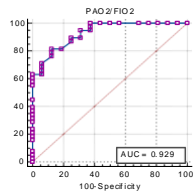

C Reactive Protein

|                      |        |
|----------------------|--------|
| Youden index J       | 0.5066 |
| Associated criterion | 153.2  |
| Sensitivity          | 63.16  |
| Specificity          | 87.5   |

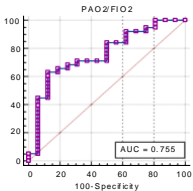

EARLIEST BAL VIRAL COPY NUMBER

|                      |        |
|----------------------|--------|
| Youden index J       | 0.2895 |
| Associated criterion | 5.42   |
| Sensitivity          | 78.95  |
| Specificity          | 50     |

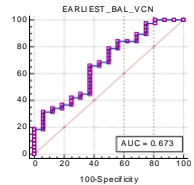

HIGHEST BAL VIRAL COPY NUMBER

|                      |        |
|----------------------|--------|
| Youden index J       | 0.3224 |
| Associated criterion | 7.54   |
| Sensitivity          | 44.74  |
| Specificity          | 87.5   |

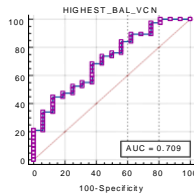

EARLIEST SERUM VIRAL COPY NUMBER

|                      |        |
|----------------------|--------|
| Youden index J       | 0.4375 |
| Associated criterion | 3.32   |
| Sensitivity          | 50     |
| Specificity          | 93.75  |

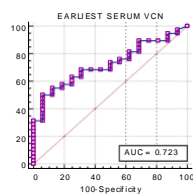

HIGHEST SERUM VIRAL COPY NUMBER

|                      |        |
|----------------------|--------|
| Youden index J       | 0.4276 |
| Associated criterion | 3.32   |
| Sensitivity          | 55.26  |
| Specificity          | 87.5   |

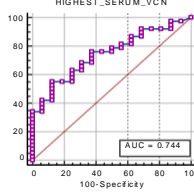

Supplement: s1 [file s1]
